# Supplementary material for: Rate enhancement by Cu in NixCu1−x/ZrO2 bimetallic catalysts for hydrodeoxygenation of stearic acid
Source: Royal Society of Chemistry journal article supplement (doi:10.1039/c9cy00181f), 2019-01-01
Supplement: c9cy00181f1.pdf [file c9cy00181f1.pdf]

## Supporting Information

### Rate enhancement by Cu in Ni<sub>x</sub>Cu<sub>1-x</sub>/ZrO<sub>2</sub> bimetallic catalysts for hydrodeoxygenation of stearic acid

Christoph Denk,<sup>a</sup> Sebastian Foraita,<sup>a</sup> Libor Kovarik,<sup>b,c</sup> Kelsey Stoerzinger,<sup>b,d</sup> Yue Liu,<sup>a</sup>

Eszter Baráth\*<sup>a</sup> and Johannes A. Lercher\*<sup>a,b</sup>

<sup>a</sup> Department of Chemistry and Catalysis Research Center, Technische Universität München  
Lichtenbergstraße 4, 85747 Garching (Germany)

<sup>b</sup> Institute for Integrated Catalysis, Pacific Northwest National Laboratory 902 Battelle Boulevard, Richland,  
WA 99352 (USA)

<sup>c</sup> Environmental Molecular Sciences Laboratory, Pacific Northwest National Laboratory, Richland, WA 99352 (USA)

<sup>d</sup> Physical and Computational Sciences Directorate, Pacific Northwest National Laboratory, Richland, Washington  
WA 99352 (USA)

E-mail: eszter.barath@tum.de, johannes.lercher@ch.tum.de

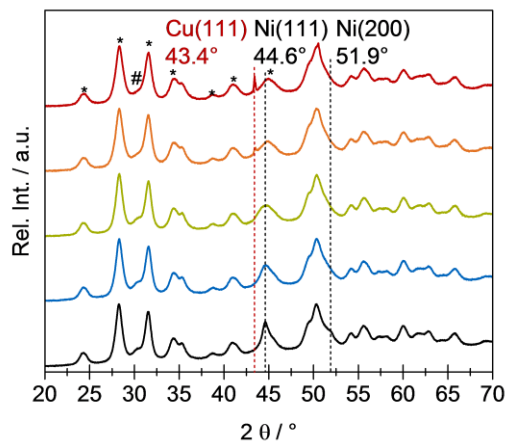

**Fig. S1** XRD patterns of  $\text{Ni}_x\text{Cu}_{1-x}/\text{ZrO}_2$  ( $x = 1, 0.79, 0.59, 0.29, 0$ ) in the  $2\theta$  range of  $20\text{--}70^\circ$ . Monoclinic  $\text{ZrO}_2$  (\*), tetragonal  $\text{ZrO}_2$  (#).

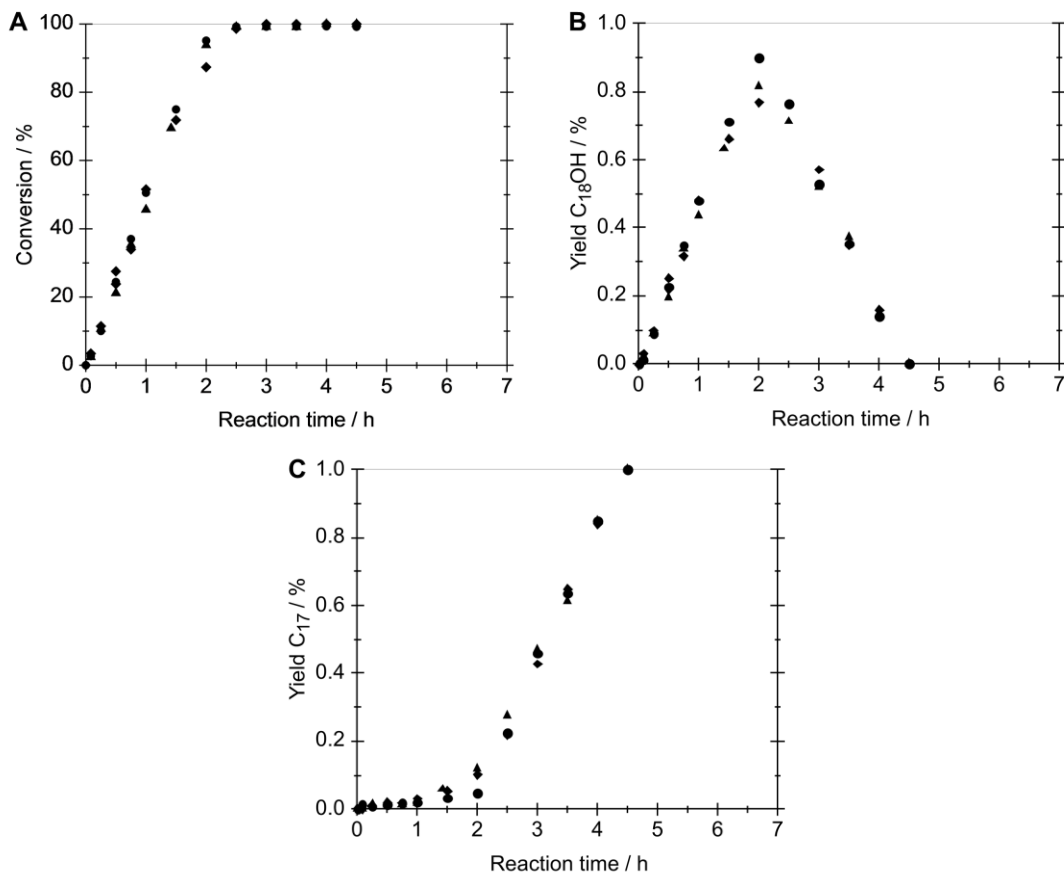

**Fig. S2** Recycling experiments (**S2A**/Conversion vs reaction time; **S2B**/Yield of  $\text{C}_{18}\text{OH}$  vs reaction time; **S2C**/Yield  $\text{C}_{17}$  vs reaction time). (● 1<sup>st</sup>, ♦ 2<sup>nd</sup>, ■ 3<sup>rd</sup> cycle) Reaction conditions: stearic acid (0.212 g),  $\text{Ni}_{0.59}\text{Cu}_{0.41}/\text{ZrO}_2$  (0.085 g), *n*-dodecane (100 mL),  $260^\circ\text{C}$ ,  $p(\text{H}_2) = 40$  bar, stirring at 600 rpm. At  $25^\circ\text{C}$  stearic acid (0.212 g) was added for a new experiment. The reaction volume was balanced with *n*-dodecane to 100 mL prior. Assuming that 0 % *n*-heptadecane was produced within the first 5 min of reaction time, this amount was subtracted in runs 2 and 3 from each sample.

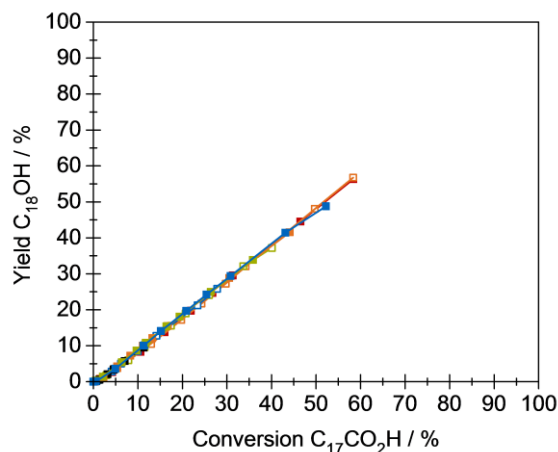

**Fig. S3** Yield of 1-octadecanol as function of stearic acid conversion over  $\text{Ni}_x\text{Cu}_{1-x}/\text{ZrO}_2$  ( $x = 1, 0.79, 0.59, 0.29, 0$ ) and respective physical mixtures (empty symbols) Reaction conditions: Stearic acid (0.5 g), Stearic acid (0.5 g), ( $x$ )  $\text{Ni}/\text{ZrO}_2$  and  $(1-x)$   $\text{Cu}/\text{ZrO}_2$  catalyst ( $x = 1, 0.79, 0.59, 0.29, 0$ ; sum 0.05 g), *n*-dodecane (100 mL), 260 °C,  $p(\text{H}_2) = 40$  bar, 600 rpm.

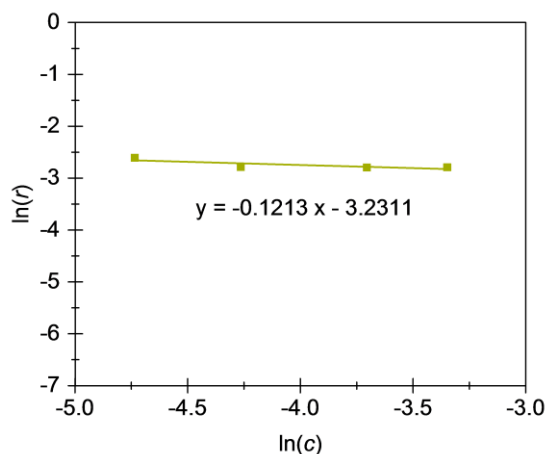

**Fig. S4** Determination of reaction order of stearic acid for  $\text{Ni}_{0.59}\text{Cu}_{0.41}/\text{ZrO}_2$ . Reaction conditions: Stearic acid (1.0 – 0.250 g),  $\text{Ni}_{0.59}\text{Cu}_{0.41}/\text{ZrO}_2$  catalyst (0.05 g), *n*-dodecane (100 mL),  $T = 260$ , °C,  $p(\text{H}_2) = 40$  bar, stirring at 600 rpm.

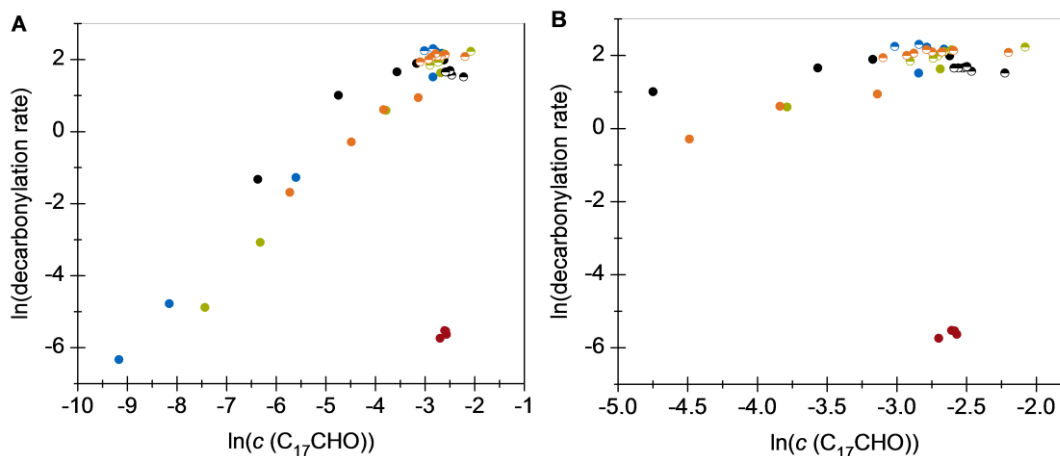

**Fig. S5** Determination of reaction order of 1-octadecanol for  $\text{Ni}_x\text{Cu}_{1-x}/\text{ZrO}_2$  ( $x = 1, 0.79, 0.59, 0.29$ ); **A** full concentration range first order regime  $-10 < \ln(c(\text{C}_{17}\text{CHO})) < -5$  and zero order regime  $\ln(c(\text{C}_{17}\text{CHO})) > -4$ ; **B** zero order regime. Reaction conditions: Stearic acid (0.5 g),  $\text{Ni}_x\text{Cu}_{1-x}/\text{ZrO}_2$  catalyst ( $x = 1, 0.79, 0.59, 0.29, 0$ ; 0.2 g (full symbols, 0.05g half symbols), *n*-dodecane (100 mL),  $T = 260$  °C,  $p(\text{H}_2) = 40$  bar, stirring at 600 rpm.

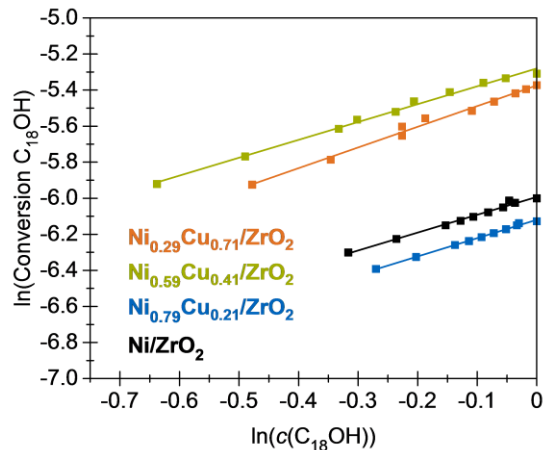

**Fig. S6** Determination of reaction order of 1-octadecanol conversion for  $\text{Ni}_x\text{Cu}_{1-x}/\text{ZrO}_2$  ( $x = 1, 0.79, 0.59, 0.29$ ) Reaction conditions: 1-octadecanol (0.5 g),  $\text{Ni}_x\text{Cu}_{1-x}/\text{ZrO}_2$  catalyst ( $x = 1, 0.79, 0.59, 0.29$ ; 0.05 g), *n*-dodecane (100 mL),  $T = 260\text{ }^\circ\text{C}$ ,  $p(\text{H}_2) = 40\text{ bar}$ , stirring at 600 rpm.

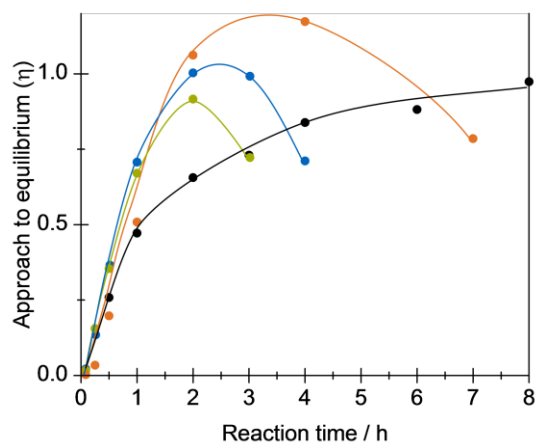

**Fig. S7** Approach to equilibrium between 1-octadecanol and 1-octadecanal versus reaction time for  $\text{Ni}_x\text{Cu}_{1-x}/\text{ZrO}_2$  ( $x = 1, 0.79, 0.59, 0.29$ ) Reaction conditions: Stearic acid (0.5 g),  $\text{Ni}_x\text{Cu}_{1-x}/\text{ZrO}_2$  catalyst ( $x = 1, 0.79, 0.59, 0.29$ ; 0.2 g), *n*-dodecane (100 mL),  $T = 260\text{ }^\circ\text{C}$ ,  $p(\text{H}_2) = 40\text{ bar}$ , stirring at 600 rpm.

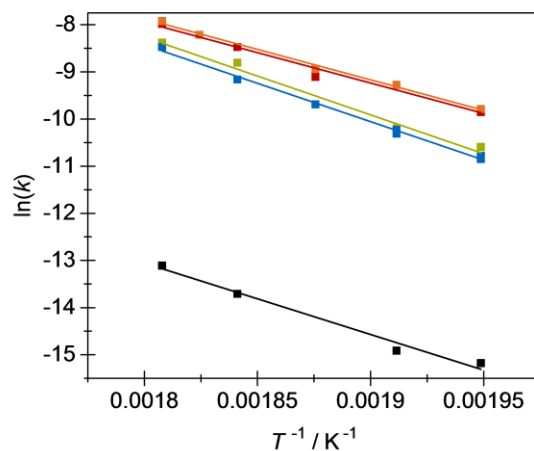

**Fig. S8** Arrhenius-plot for the conversion of stearic acid to 1-octadecanol on  $\text{Ni}_x\text{Cu}_{1-x}/\text{ZrO}_2$  catalyst ( $x = 1, 0.79, 0.59, 0.29, 0$ ) Reaction conditions: Stearic acid (0.5 g),  $\text{Ni}_x\text{Cu}_{1-x}/\text{ZrO}_2$  catalyst ( $x = 1, 0.79, 0.59, 0.29, 0$ ; 0.05 g), *n*-dodecane (100 mL),  $T = 240 - 280\text{ }^\circ\text{C}$ ,  $p(\text{H}_2) = 40\text{ bar}$ , stirring at 600 rpm.

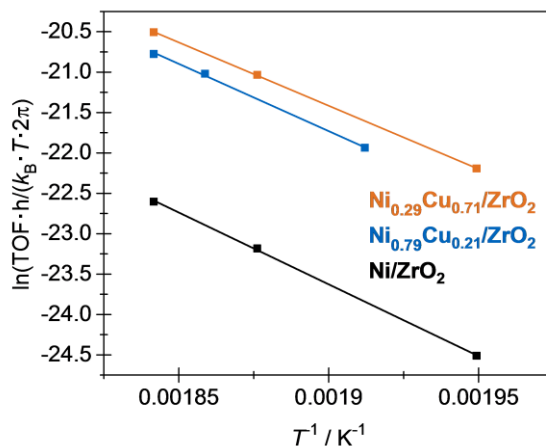

**Fig. S9** Determining  $\Delta H$  and  $\Delta S$  by using Eyring equation for the decarbonylation of 1-octadecanal over  $\text{Ni}_x\text{Cu}_{1-x}/\text{ZrO}_2$  catalyst ( $x = 1, 0.79, 0.29$ ) Reaction conditions: 1-octadecanal (0.5 g),  $\text{Ni}_x\text{Cu}_{1-x}/\text{ZrO}_2$  catalyst ( $x = 1, 0.79, 0.29$ ; 0.05 g), *n*-dodecane (100 mL),  $T = 240 - 270^\circ\text{C}$ ,  $p(\text{H}_2) = 40$  bar, stirring at 600 rpm.

**Table S1** Detailed amounts of  $\text{ZrO}_2$ ,  $\text{Ni}(\text{NO}_3)_2 \times 6\text{H}_2\text{O}$  and  $\text{Cu}(\text{NO}_3)_2 \times x\text{H}_2\text{O}$  to synthesize bimetallic  $\text{Ni}_x\text{Cu}_{1-x}/\text{ZrO}_2$  via wet impregnation technique.

| Catalyst                                                | $m(\text{ZrO}_2)$ / g | $m[\text{Ni}(\text{NO}_3)_2 \times 6\text{H}_2\text{O}]$ / g | $m[\text{Cu}(\text{NO}_3)_2 \times x\text{H}_2\text{O}]$ / g |
|---------------------------------------------------------|-----------------------|--------------------------------------------------------------|--------------------------------------------------------------|
| Ni/ZrO <sub>2</sub>                                     | 7.0                   | 3.85                                                         | –                                                            |
| Ni <sub>0.79</sub> Cu <sub>0.21</sub> /ZrO <sub>2</sub> | 7.0                   | 2.89                                                         | 0.57                                                         |
| Ni <sub>0.59</sub> Cu <sub>0.41</sub> /ZrO <sub>2</sub> | 7.0                   | 1.93                                                         | 1.15                                                         |
| Ni <sub>0.29</sub> Cu <sub>0.71</sub> /ZrO <sub>2</sub> | 7.0                   | 0.96                                                         | 1.72                                                         |
| Cu/ZrO <sub>2</sub>                                     | 7.0                   | –                                                            | 2.30                                                         |

### Kinetic analysis

The kinetic analysis was made based on the below reaction network with the analysis of step (a), (b) (c). (The same scheme in the manuscript is numbered as **Scheme 1**). The reaction rate constant in each step is given as well.

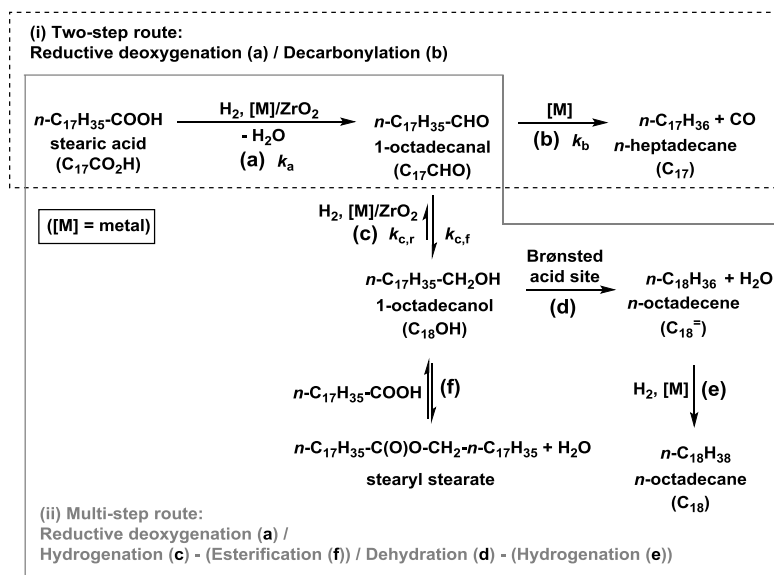

Stearic acid, 1-octadecanal and 1-octadecanol competitively adsorb on catalyst, hence their coverage on catalysts are expressed as:

$$\theta_{\text{Acid}} = \frac{K_{\text{Acid}}c_{\text{Acid}}}{1 + K_{\text{Acid}}c_{\text{Acid}} + K_{\text{Ald}}c_{\text{Ald}} + K_{\text{Alco}}c_{\text{Alco}}} \quad (\text{Eqn S1})$$

$$\theta_{\text{Ald}} = \frac{K_{\text{Ald}}c_{\text{Ald}}}{1 + K_{\text{Acid}}c_{\text{Acid}} + K_{\text{Ald}}c_{\text{Ald}} + K_{\text{Alco}}c_{\text{Alco}}} \quad (\text{Eqn S2})$$

$$\theta_{\text{Alco}} = \frac{K_{\text{Alco}}c_{\text{Alco}}}{1 + K_{\text{Acid}}c_{\text{Acid}} + K_{\text{Ald}}c_{\text{Ald}} + K_{\text{Alco}}c_{\text{Alco}}} \quad (\text{Eqn S3})$$

The  $\theta_{\text{Acid}}$ ,  $\theta_{\text{Ald}}$  and  $\theta_{\text{Alco}}$  are the coverages of stearic acid, 1-octadecanal and 1-octadecanol on the catalyst; The  $K_{\text{Acid}}$ ,  $K_{\text{Ald}}$  and  $K_{\text{Alco}}$  are their adsorption constants and the  $c_{\text{Acid}}$ ,  $c_{\text{Ald}}$  and  $c_{\text{Alco}}$  are their concentrations.

Their reaction rates are given by

$$\frac{dc_{\text{Acid}}}{dt} = -k_a n_{\text{cat}} \theta_{\text{Acid}} \quad (\text{Eqn S4})$$

$$\frac{dc_{\text{Ald}}}{dt} = k_a n_{\text{cat}} \theta_{\text{Acid}} - k_b n_{\text{cat}} \theta_{\text{Ald}} - k_{c,f} n_{\text{cat}} \theta_{\text{Ald}} \quad (\text{Eqn S5})$$

$$\frac{dc_{\text{Alco}}}{dt} = -k_{c,r} n_{\text{cat}} \theta_{\text{Alco}} + k_{c,f} n_{\text{cat}} \theta_{\text{Ald}} \quad (\text{Eqn S6})$$

in which  $n_{\text{cat}}$  is the number of active site on the catalysts loaded in the reaction. The formation rate of *n*-heptadecane is

$$\frac{dc_{\text{Hept}}}{dt} = k_b n_{\text{cat}} \theta_{\text{Ald}} \quad (\text{Eqn S7})$$

$k_a$  is quantified by measuring the initial conversion rate of acid, where  $\theta_{\text{Ald}}$ ,  $\theta_{\text{Alco}}$  are zero. Reaction order of acid being zero indicates that  $\theta_{\text{Acid}}$  is 1.

$$\frac{dc_{\text{Acid}}}{dt} = -k_a n_{\text{cat}} \Rightarrow k_a = -\frac{1}{n_{\text{cat}}} \frac{dc_{\text{Acid}}}{dt} \quad (\text{Eqn S8})$$

Strong inhibition of decarbonylation of aldehyde to alkane by the presence of acid indicates the strong adsorption of acid on catalysts. To determine the decarbonylation rate of aldehyde in absence of stearic acid, we performed the experiments to calculate the decarbonylation rate starting with 1-octadecanol. Since the hydrogenation of the 1-octadecanal is enormously higher than the decarbonylation rate, a direct approach for decarbonylation rates using 1-octadecanal fails.

$$\frac{dc_{\text{Hept}}}{dt} = \frac{n_{\text{cat}} k_b K_{\text{Ald}} c_{\text{Ald}}}{1 + K_{\text{Ald}} c_{\text{Ald}} + K_{\text{Alco}} c_{\text{Alco}}} \quad (\text{Eqn S9})$$

The reaction order of aldehyde is zero for the formation of 1-heptadecane, indicating a strong adsorption of aldehyde than alcohol. ( $K_{\text{Ald}}c_{\text{Ald}} \gg K_{\text{Alco}}c_{\text{Alco}}$ ;  $K_{\text{Ald}}c_{\text{Ald}} \gg 1$ )

$$\frac{dc_{\text{Hept}}}{dt} = n_{\text{cat}} k_b \Rightarrow k_b = \frac{1}{n_{\text{cat}}} \frac{dc_{\text{Hept}}}{dt} \quad (\text{Eqn S10})$$
